# Supplementary material for: Maui Wildfire and 988 Suicide and Crisis Lifeline Call Volume and Capacity
Source: PubMed Central journal article supplement (PMC11579797; doi:10.1001/jamanetworkopen.2024.46523), 2024-11-20
Supplement: jamanetwopen-e2446523-s001.pdf [file jamanetwopen-e2446523-s001.pdf]

## Data Sharing Statement

### Data

Data available: No

### Additional Information

**Explanation for why data not available:** Data is publicly available via Vibrant Health (<https://988lifeline.org/our-network/>).
